# Supplementary material
Source: PubMed Central journal article supplement (PMC2921230)
Supplement: NIHMS224191-supplement-SUPPL.pdf [file NIHMS224191-supplement-SUPPL.pdf]

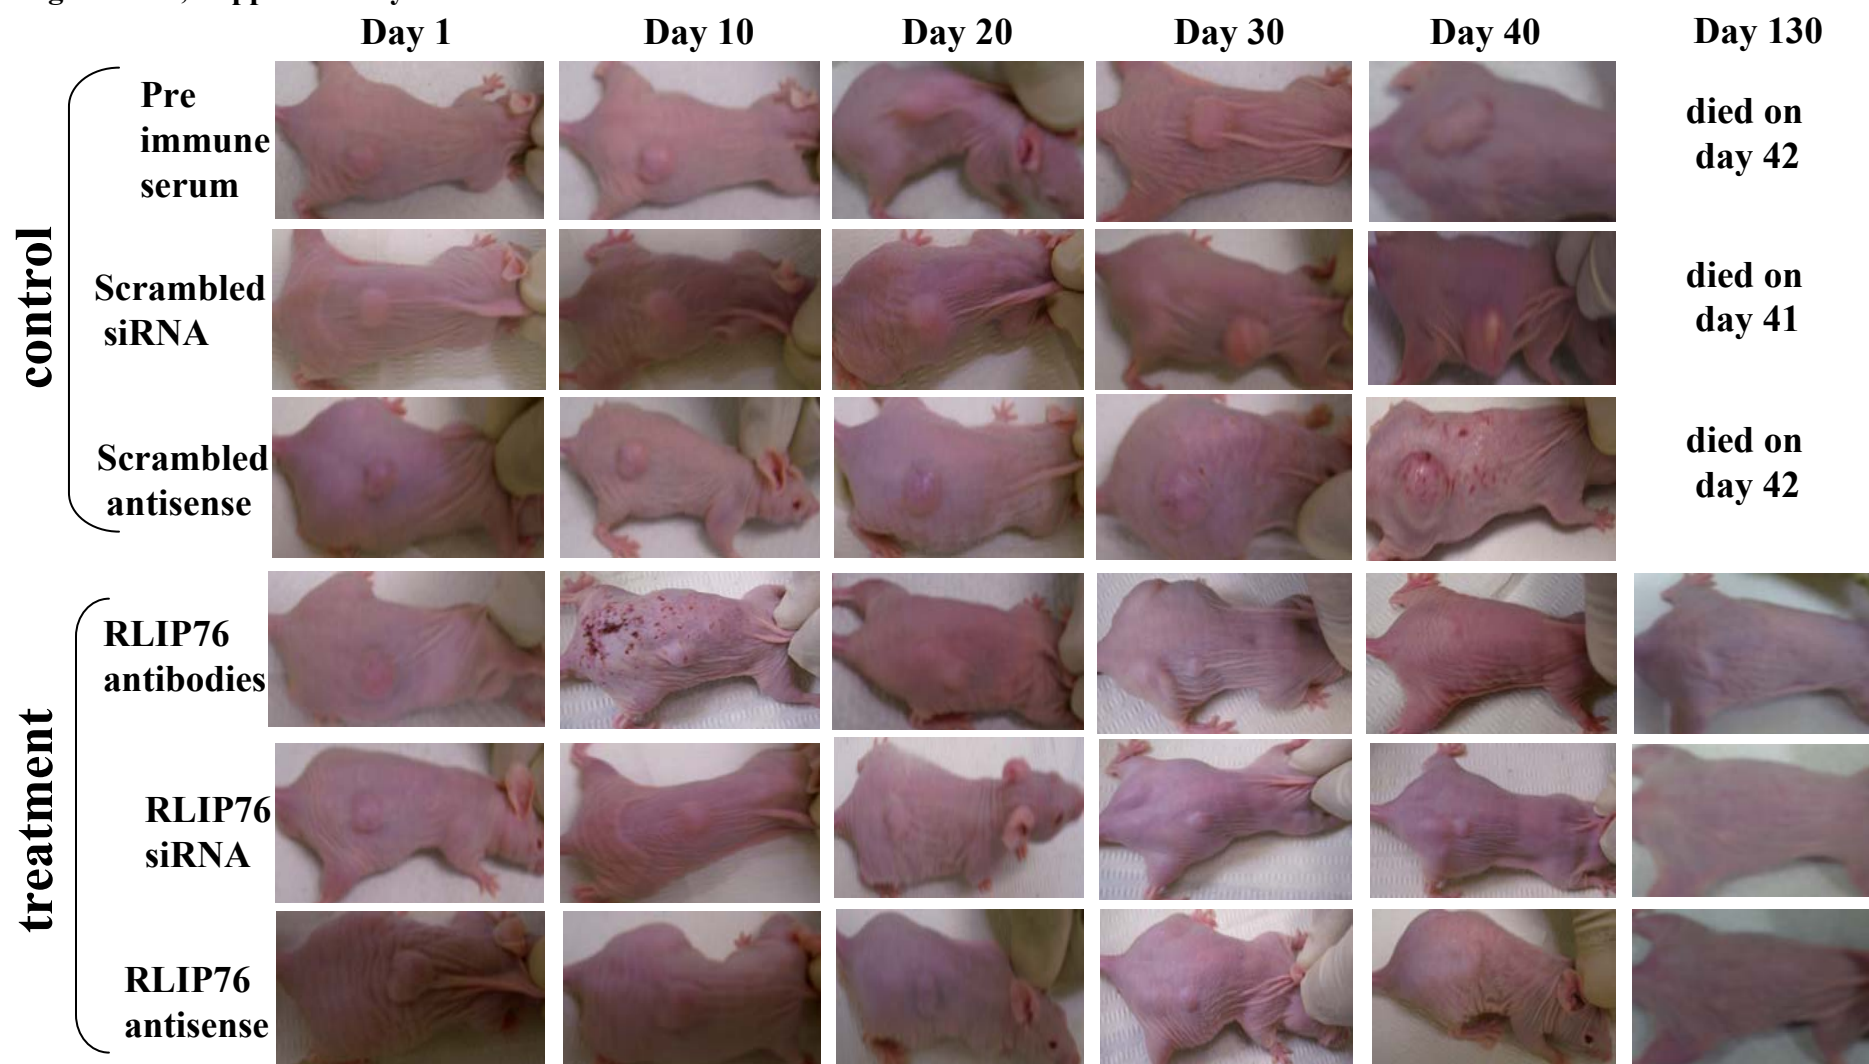

**Effect of anti-RLIP76 IgG, RLIP76 siRNA and RLIP76 antisense on the size of subcutaneously implanted human kidney cancer cells (Caki-2) in nude mice** Hsd: Athymic nude nu/nu mice were obtained from Harlan, Indianapolis, IN. All animal experiments were carried out in accordance with a protocol approved by the Institutional Animal Care and Use Committee (IACUC). Thirty 11-week-old mice were divided into six groups of 5 animals (treatment with pre-immune serum, scrambled siRNA, scrambled anti-sense DNA, RLIP76 antibodies, RLIP76 siRNA and RLIP76 antisense). All 30 animals were injected with  $2 \times 10^6$  human kidney cancer cells (Caki-2) suspensions in 100  $\mu$ l of PBS, subcutaneously into one flank of each nu/nu nude mouse. Animals were examined daily for signs of tumor growth. When tumors reached a cross-sectional area of  $\sim 42 \text{ mm}^2$  (22 days later), animals were randomized treatment groups as indicated in the figure. Treatment consisted of 200  $\mu$ g of RLIP76 antibodies, siRNA or antisense in 100  $\mu$ l PBS. Control groups were treated with 200  $\mu$ g/100  $\mu$ l pre-immune serum, scrambled siRNA or scrambled anti-sense DNA. Tumors were measured in two dimensions using calipers. Photographs of animals were taken at **day 1, day 10, day 20, day 30, day 40 and day 130** after treatment are shown for all groups.
